# Supplementary material for: The role of the FSGS disease gene product and nuclear pore protein NUP205 in regulating nuclear localization and activity of transcriptional regulators YAP and TAZ
Source: PubMed Central journal article supplement — Hum Mol Genet. 2023 Aug 11;32(22):3153–65. doi: 10.1093/hmg/ddad135 (PMC10630254; doi:10.1093/hmg/ddad135), 2023-08-11
Supplement: ester_et_al_supplemental_figures_ddad135.pdf [file ester_et_al_supplemental_figures_ddad135.pdf]

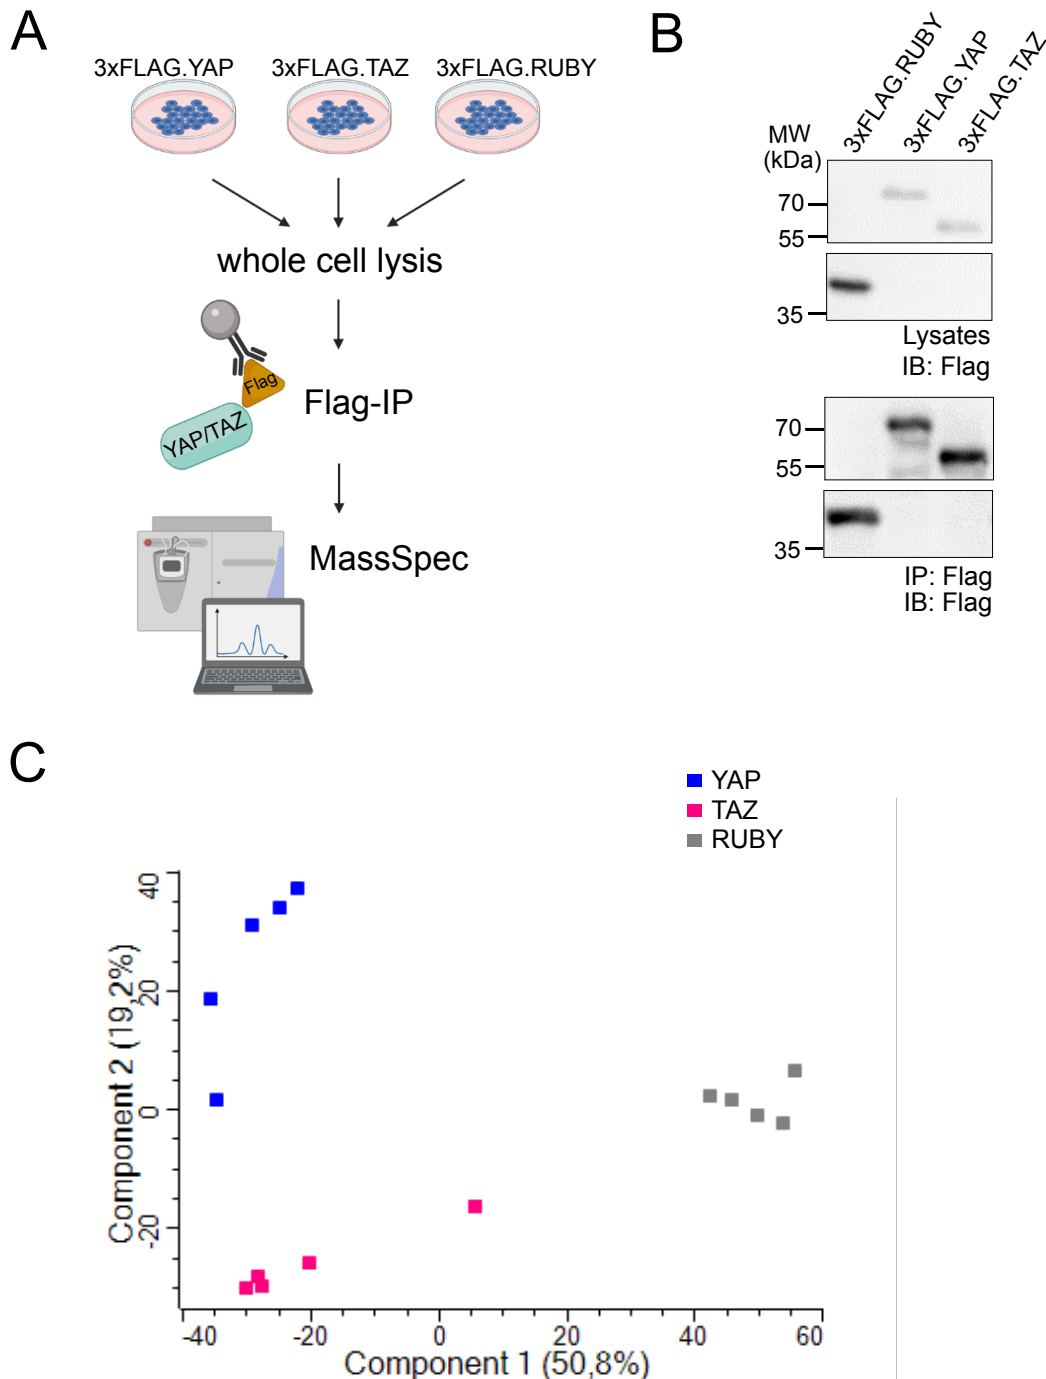

**Supplementary Figure 1.** Mass Spectrometry sample submission and quality controls of the interaction datasets. (A) Flag-immunoprecipitations of whole cells lysates of hsMPs cell lines overexpressing either flagged Ruby (3XFLAG.RUBY), Yap (3XFLAG.YAP) or Taz (3XFLAG.TAZ) were submitted to Mass Spectrometry (n=5). (B) For every sample preparation an immunoblot was performed, showing successful pull-down of 3XFLAG.RUBY, 3XFLAG.YAP and 3XFLAG.TAZ. Representative data from the independent experiments is shown. (C) Principal component analysis of all samples submitted. Scatter plot calculated from the label-free quantification (LFQ) values of all proteins identified in the respective samples: 3XFLAG.YAP in blue (YAP), 3XFLAG.TAZ in pink (TAZ) and 3XFLAG.RUBY in grey (RUBY). Created with BioRender.com.

**A**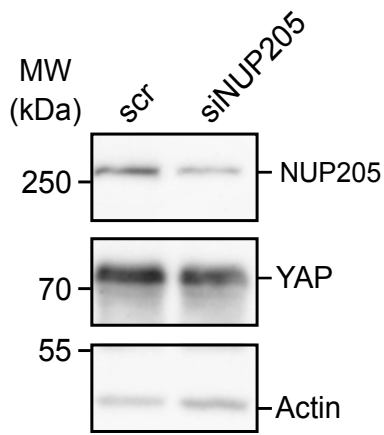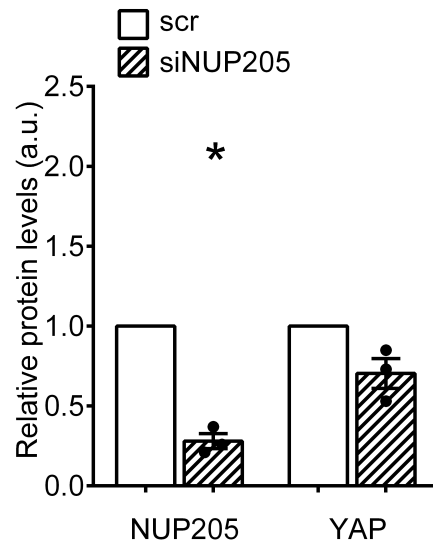**B**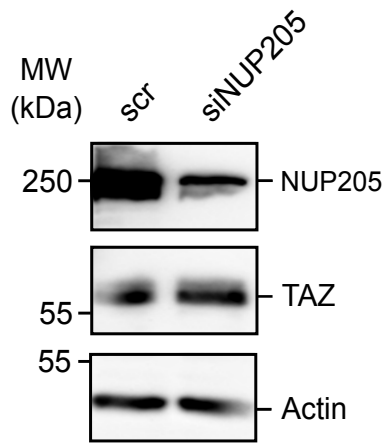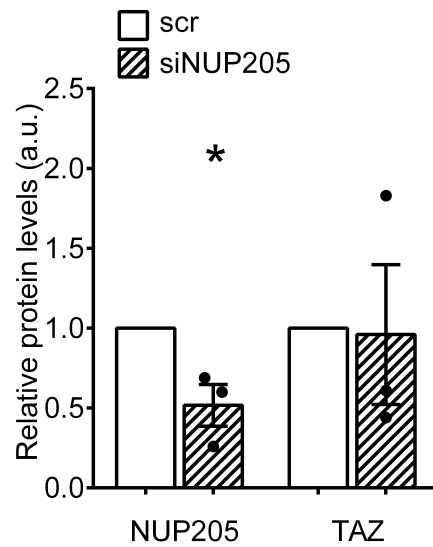

**Supplemental Figure 2.** Downregulation of endogenous NUP205 does not affect YAP and TAZ whole cell endogenous expression. (A) Downregulation of endogenous NUP205 in HEK293T did not change YAP endogenous whole cells expression. (B) Downregulation of endogenous NUP205 in HEK293T did not change TAZ endogenous whole cells expression. Densitometry analysis of expression of YAP and TAZ relative to  $\beta$ -Actin (arbitrary units, au).  $n=3$ . Mean  $\pm$  SEM. \* significant difference when compared to scrambled ( $p < 0.05$ ; unpaired Student's  $t$  test).

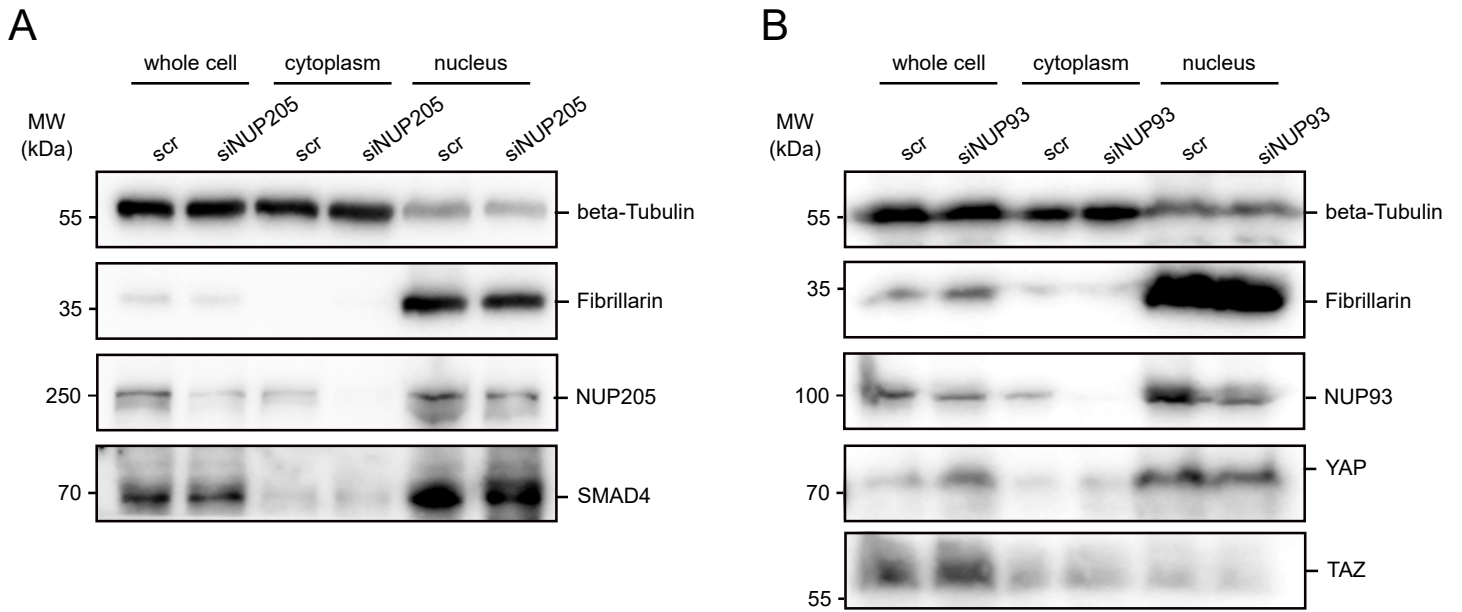

**Supplemental Figure 3.** (A) NUP205 is not required for nucleocytoplasmic shuttling of SMAD4. (B) NUP93 is not required for nucleocytoplasmic shuttling of YAP and TAZ.

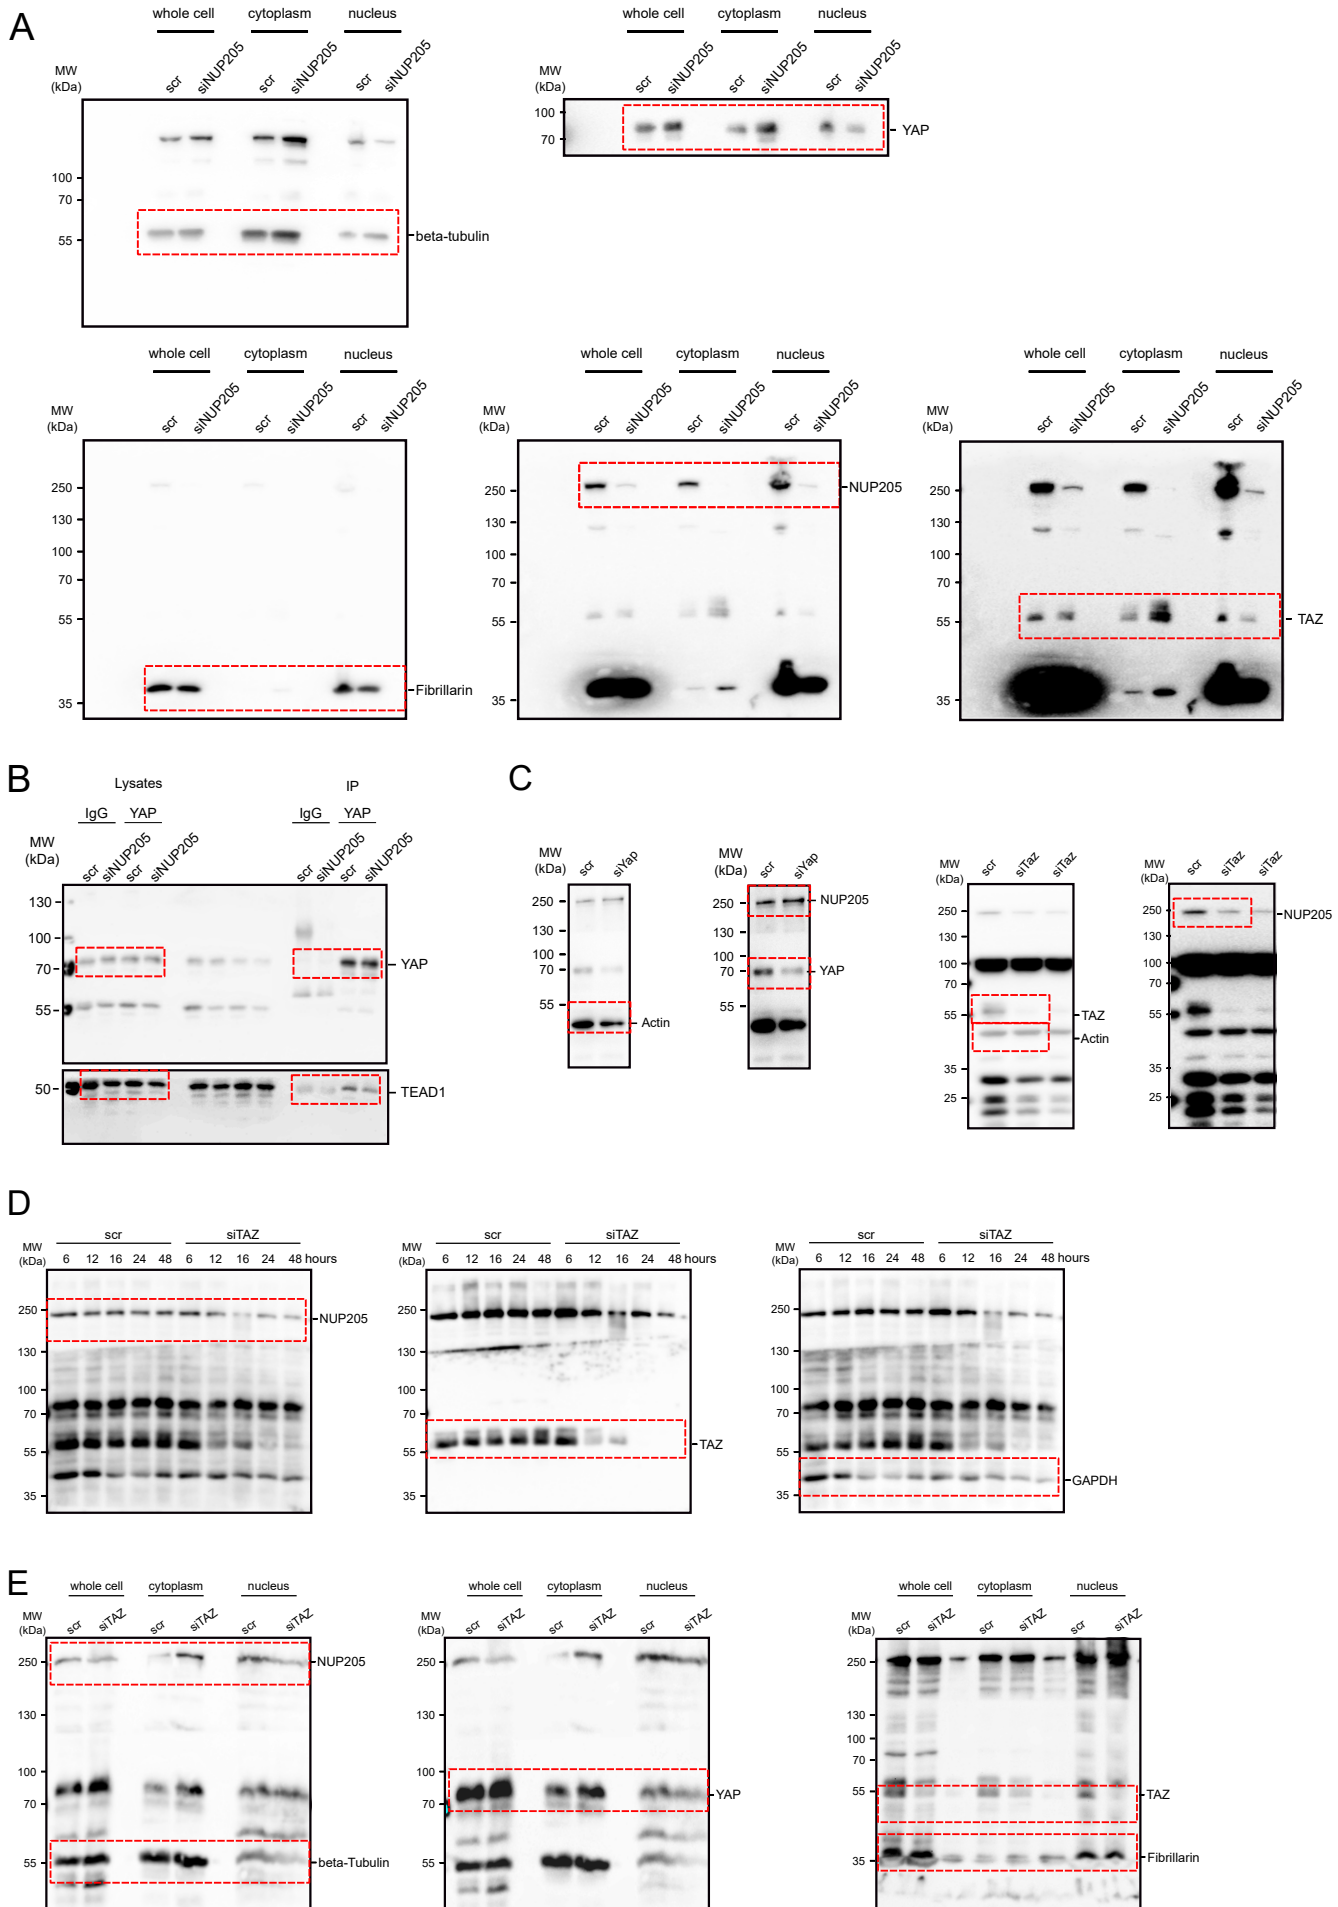

**Supplemental Figure 4.** Original data: full-sized immunoblots. Original western blots, only cropped to membrane size (A) of Figure 2A, (B) of Figure 3A, (C) of Figure 4A, (D) of Figure 4B and (E) of Figure 5A.
